1 **Age and Sex-Dependent Differences in Human Cardiac Matrix-Bound Exosomes Modulate Fibrosis**  
2 **through Synergistic miRNA Effects**

3

4 Authors: George Ronan<sup>1,2</sup>, Gokhan Bahcecioglu<sup>2,3</sup>, Jun Yang<sup>4</sup>, Pinar Zorlutuna<sup>1,2,3,4\*</sup>

5 <sup>1</sup>Bioengineering Graduate Program, University of Notre Dame, Notre Dame, IN, 46556, USA

6 <sup>2</sup>Department of Aerospace and Mechanical Engineering, University of Notre Dame, Notre Dame, IN,  
7 46556, USA

8 <sup>3</sup>Harper Cancer Research Institute, University of Notre Dame, Notre Dame, 46556, USA

9 <sup>4</sup>Department of Chemical and Biomolecular Engineering, University of Notre Dame, Notre Dame, IN,  
10 46556, USA

11 \*Corresponding Author: Pinar Zorlutuna

12

13 George Ronan (ORCID: 0000-0003-1485-0914): gronan@nd.edu

14 Gokhan Bahcecioglu (ORCID: 0000-0002-6228-4745): gbahceci@nd.edu

15 Jun Yang: jyang26@nd.edu

16 Pinar Zorlutuna (ORCID: 0000-0002-3122-7553): pzorlutu@nd.edu

17

18 Data Availability Statement: All data required for production of the manuscript is included in this  
19 submission. Additional raw data can be provided upon request.

- 20 Funding Statement: Research reported in this publication was supported by NSF-CAREER Award #  
21 1651385, NSF CBET Award # 1805157 and NIH Award # 1 R01 HL141909-01A1
- 22 Competing Interests Statement: The authors have no competing interest to disclose.
- 23 Ethics Statement: All animal work was performed under the approved IACUC protocol number 18-05-4687  
24
- 25 Keywords: Aging, Exosomes, ECM, Cardiac, Fibrosis, miRNA

26 **ABSTRACT**

27 Aging is a risk factor for cardiovascular disease, the leading cause of death worldwide. Cardiac fibrosis is  
28 a harmful result of repeated myocardial infarction that increases risk of morbidity and future injury.  
29 Interestingly, rates of cardiac fibrosis are different between young and aged individuals, as well as men  
30 and women. Here, for the first time, we identify and isolate matrix-bound extracellular vesicles from the  
31 left ventricles (LVs) of young or aged men and women. These LV vesicles (LVVs) show differences in  
32 morphology and content between these four cohorts. LVVs effects on fibrosis were also investigated *in*  
33 *vitro*, and it was shown that aged male LVVs were pro-fibrotic, while other LVVs were anti-fibrotic. miRNAs  
34 identified from these LVVs could partially recapitulate these effects together, but not individually, and  
35 confer other benefits. These data suggest that synergistic effects of matrix-resident exosomal miRNAs  
36 may influence the differential clinical response to MI.

37 **INTRODUCTION**

38 Cardiovascular disease (CVD) is the leading cause of death in the United States and worldwide, with  
39 myocardial infarction (MI) as the chief cause of death among CVDs<sup>1</sup>. While initial incidence of MI tends to  
40 be non-fatal, the tissue response results in thus-far irreversible damage to the myocardium<sup>2</sup>. This damage  
41 commonly takes the form of cardiac fibrosis, or excessive scarring and defunctionalization of the cardiac  
42 tissue, which increases risk and mortality of a future cardiac event<sup>2,3</sup>.

43 Aging is a major risk factor for cardiovascular disease and numerous other diseases and is a growing area  
44 of research given the aging population in the United States and other countries<sup>4,5</sup>. Furthermore, data  
45 increasingly suggests that age and sex play significant roles in the likelihood and severity of MI and  
46 resulting fibrosis<sup>5-8</sup>. Males over 50 years of age tend to have a higher risk of fibrosis and typically  
47 experience MI 9 years earlier than females, although these differences subside as age surpasses 80

48 years<sup>6,9,10</sup>. While the precise reasons for these discrepancies remain elusive, recent data suggests that  
49 aging and sex-related long-term changes to the cardiac microenvironment account for this differential  
50 response to MI<sup>6,8,11</sup>.

51 In recent years, the use of extracellular matrix (ECM) or ECM-derived materials in the treatment of cardiac  
52 fibrosis has seen reliable success in pre-clinical trials<sup>12-16</sup>. These approaches take advantage of the  
53 endogenous cardioprotective effects of ECM on the local microenvironment to promote functional tissue  
54 recovery after cardiac injury<sup>17,18</sup> through local immunomodulation, stem cell recruitment, and decreased  
55 scar tissue formation<sup>19-21</sup>. These effects synergize to enhance regenerative healing and decrease fibrosis  
56 post-MI. However, the mechanisms by which ECM promotes cardiac repair are not well understood, and  
57 recent studies suggest that the release of embedded signaling molecules such as cytokines or growth  
58 factors<sup>22</sup> and ECM-microRNA (miRNA) interactions<sup>11</sup> are major effectors of both pro and anti-fibrotic  
59 signaling pathways post-MI.

60 The identification of these factors suggest that the beneficial effects of ECM may be conferred by  
61 extracellular vesicles (EVs), as both cytokines and miRNAs are commonly packaged in EVs when secreted  
62 from cells<sup>23</sup>. Previously unidentified ECM-bound EVs could be key mediators of the beneficial effects of  
63 ECM treatment, and isolation, quantification, and characterization of these EVs will elucidate essential  
64 mechanisms of ECM-mediated cardioprotection. Furthermore, the isolation of key functional compounds,  
65 either EVs themselves or those contained in EVs, may provide the benefits of ECM treatment while  
66 mitigating many associated challenges, such as immune response, sample preparation variability, and  
67 sustainability of production. Another challenge, however, is how to modulate key regulators of fibrosis-  
68 related signaling pathways after identifying them. While cytokine-mediated inflammatory signaling  
69 pathways are attractive targets for clinical intervention, as they play a pivotal role in the health and  
70 functionality of a tissue and allow for direct intervention in the onset and resolution of inflammation<sup>24,25</sup>,

71 the degree and mechanisms of involvement remain an active area of research<sup>24</sup>. Recent advances in our  
72 understanding of the tissue microenvironment *in vivo* have suggested that this may be due to targeted  
73 paracrine signaling controlling these effects, resulting from the highly specific packaging of miRNAs and  
74 cytokines in exosomes, a specific, tightly regulated class of EV<sup>23</sup>.

75 Exosomes are a subgroup of EVs with diameters typically between 30 nm and 200 nm that are commonly  
76 released from most cell types and contain cytokines, chemokines, miRNA, and other miscellaneous  
77 signaling molecules that affect function in recipient cells. These contents influence many diverse and  
78 pathologically relevant biological processes, including angiogenesis, immunomodulation, endothelial and  
79 epithelial to mesenchymal transition, and cell differentiation, and as such exosomes are both packaged  
80 and released from cells in a highly controlled manner<sup>23,26,27</sup>. As a result, recent interest in exosomes has  
81 primarily been in the role of maintaining tissue health through intra-tissue signaling and local  
82 immunomodulation<sup>23,27</sup>. This has been bolstered by the recent discovery of exosome-like EVs embedded  
83 in decellularized tissue from several human organs, including the urinary bladder and small intestine<sup>26</sup>,  
84 and decellularized mouse atrium<sup>28</sup>, as opposed to biofluid-derived EVs which have so far been ubiquitous.  
85 These embedded EVs showed beneficial immunomodulatory effects, and those isolated from cardiac  
86 tissue enhanced cardiomyocyte function *in vitro*<sup>28,29</sup>, which provides exciting prospects for how these EVs  
87 may affect MI response and subsequent cardiac fibrosis and suggests that these EVs may be a core  
88 functional component of biosignaling in the ECM. Further investigation of these EVs may reveal precise  
89 mechanisms by which ECM treatment confers protective effects, both furthering knowledge of the  
90 interplay between microenvironment and tissue health and providing a wealth of targets for clinical  
91 intervention without necessitating the use of ECM. However, the impact of both induced and innate  
92 differences in the microenvironment may have on these ECM-bound exosomes is currently unknown.

93 Recently, exosomes have been increasingly investigated for links with MI response<sup>14</sup>. Exosomes isolated  
94 from the cerebrospinal fluid or plasma of young or aged subjects have been demonstrated to have  
95 differential effects on modulation of systemic inflammation and progression of neurodegenerative  
96 diseases<sup>4,30</sup>, and these differences can significantly affect CVD outcomes *in vivo*<sup>30</sup>. However, despite  
97 evidence suggesting that there are functional differences between exosomes from young or aged  
98 subjects, there has been little evaluation of the specific differences between these exosome populations.  
99 For this reason, exosomes have become an attractive target for ascertaining specific age-related changes  
100 in the cardiac microenvironment and the impact of any additional factors.

101 In this study we show for the first time in literature the presence of ECM-bound exosome-like EVs in  
102 human left ventricular (LV) tissue, and report the changes in size, cytokine content, and miRNA content  
103 of these LV vesicles (LVVs) as a function of age and sex. Furthermore, we study the differential effect of  
104 LVVs derived from different age and sex groups on the stress response and fibrotic transdifferentiation of  
105 cardiac fibroblasts (CFs) to myofibroblasts (MFs) in both human and murine models. Following this, we  
106 examine the role of select miRNAs identified from the LVVs in modulating this transdifferentiation. In this  
107 way, we suggest that ECM-bound exosomes are a major functional unit of the cardioprotective effects of  
108 the ECM, hosting previously identified signaling molecules of interest and recapitulating the effects of  
109 ECM treatment on the local microenvironment. Investigating the effects of age and sex on the physical  
110 characteristics and composition of human LVVs and how LVVs influence the fibroblast transdifferentiation  
111 behavior as a function of age and sex will pave the way for understanding the mechanisms of cardiac  
112 fibrosis and developing new treatment strategies to prevent fibrosis and MI.

## 113 **RESULTS**

114 ***Left Ventricular Vesicle (LVV) Isolation and Characterization:*** Human heart left ventricular tissues from  
115 young female (YF), young male (YM), aged female (AF), or aged male (AM) donors were subjected to a

116 detergent-free decellularization and EV isolation process (Figure 1A). Transmission electron microscopy  
117 (TEM) imaging verified the presence of EVs in the ECM isolate and demonstrated a stark size difference  
118 between young and aged tissue-derived vesicles (Figure 1B). Similar properties were observed in tissue  
119 examine directly under TEM (Supplemental Figure S1). This difference was also observed with  
120 nanoparticle tracking analysis (NTA), with aged EVs having average size of  $98 \text{ nm} \pm 22 \text{ nm}$  and young EVs  
121 having average size of  $171 \text{ nm} \pm 38 \text{ nm}$  (Figure 1C). All samples fell primarily within the expected size range  
122 for exosomes (30-200 nm), and dispersity decreased in aged tissue-derived samples compared to young.  
123 The concentration of vesicles was not significantly different between cohorts (Figure 1D). Western blot  
124 was performed to identify characteristic exosome markers CD9, CD63, and TSG101 (Figure 1E), as well as  
125 for characteristic cardiac cell markers Vimentin, CX43, and VE-Caherin (Supplemental Figure S2). These  
126 results showed that the particles were, or contained, exosomes, and were free of cell debris. Lysing these  
127 vesicles increased the measured protein content in solution by over 50% (Figure 1F), indicating that the  
128 isolated LVVV contained proteins.

129 ***LVV Uptake by Human Cardiac Fibroblasts (hCFs):*** Uptake of EVs by hCFs was confirmed by tracking  
130 stained EVs in cells (Figure 1G, Supplemental Figure S3). Aged EVs were taken up by hCFs at a nearly 2-  
131 fold increased rate compared to young EVs (Figure 1H), with a nearly 2-fold increase in concentration of  
132 aged EVs per cell from 8 to 24 h post treatment, and only up to 1.5-fold increase in concentration of young  
133 EVs (Figure 1I). Higher overall quantities of aged EVs per cell were also taken up compared to young EVs,  
134 with aged EVs being taken up at 2 to 3-fold higher quantity than young EVs at all timepoints (Figure 1I).

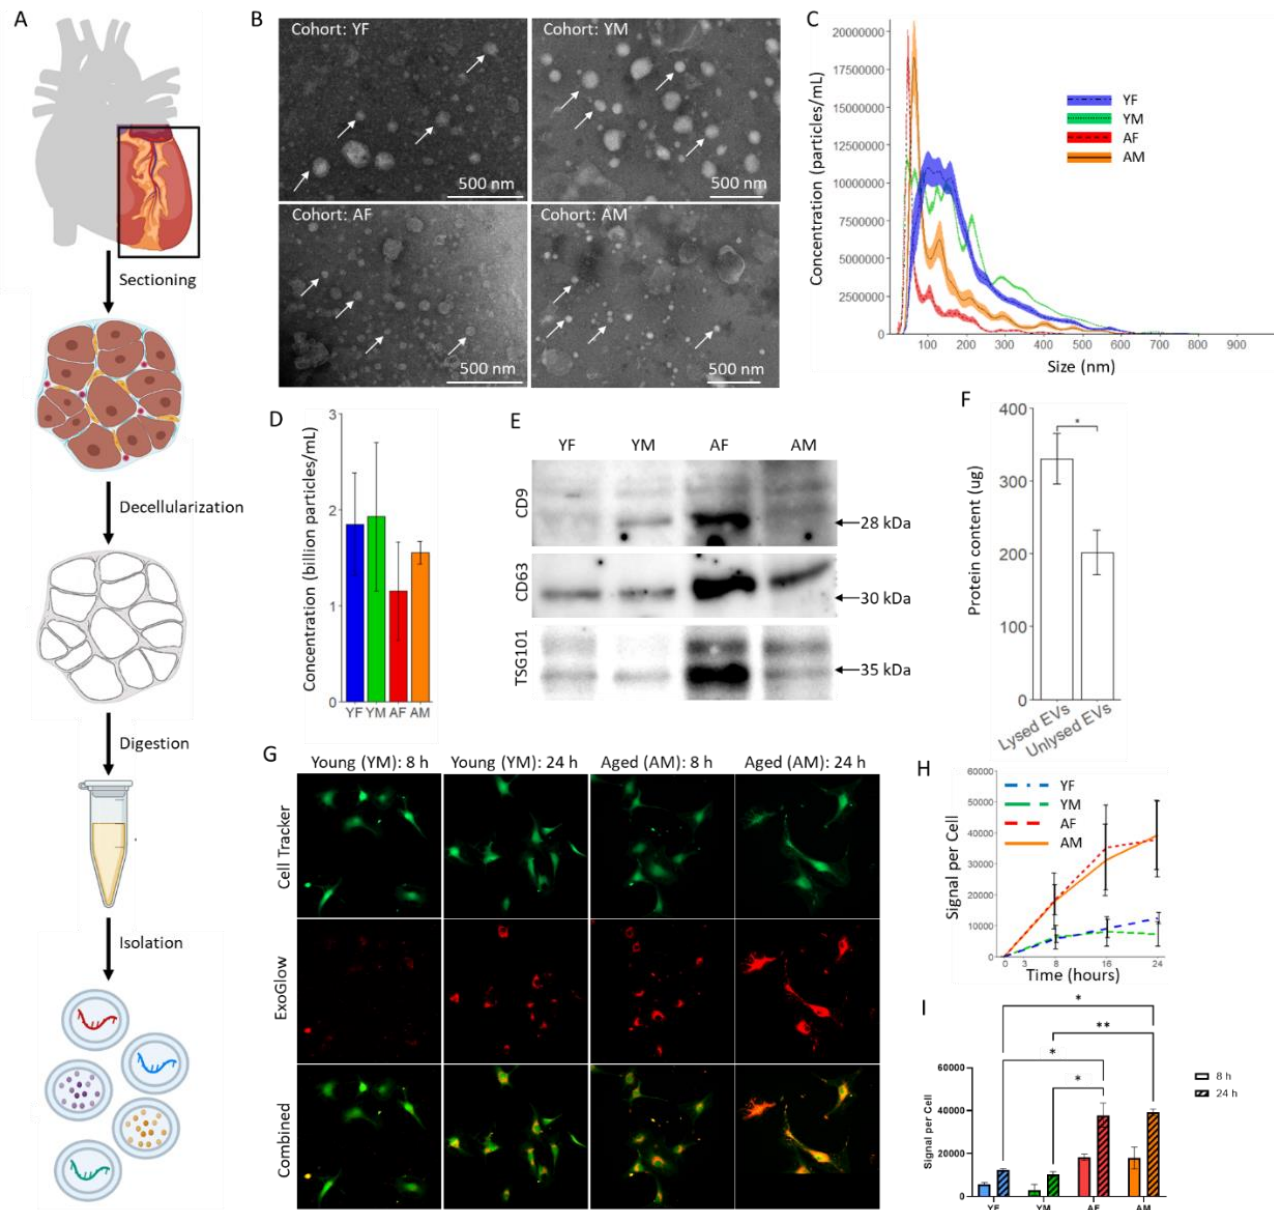

135  
 136 **Figure 1.** Functional Exosomes can be Obtained from Human Left Ventricular Extracellular Matrix with  
 137 Distinct Aging-Related Changes. (A) Brief overview of the ECM-bound EV isolation process. (B)  
 138 Transmission electron microscopy for representative imaging of all four cohorts. (C) Nanoparticle tracking  
 139 analysis with error area of EVs from all four cohorts. (D) Typical concentration of LVVs per sample. (E)  
 140 Western blotting of lysed LVVs showing the characteristic exosome markers. (F) Protein encapsulation  
 141 within LVVs. (G) Representative images of stained EV uptake by hCFs, with corresponding (H) uptake rate  
 142 and (I) overall uptake by cells ( $n \geq 3$  for all LVV sources in all cohorts, 5 images per sample). Data are  
 143 presented as the mean  $\pm$  standard deviation. \*  $p < 0.05$ , \*\*  $p < 0.01$ , assessed by Student's t-test with  
 144 Welch's correction for (D), (F), and (I).



145 **Effect of LVVs on 3D hCF Gel Contraction:** To assess the effects of LVV treatment on MF  
146 transdifferentiation in 3D culture, hCFs were seeded either in collagen gels with gel contraction assessed,  
147 or on tissue culture plates with wound healing (through scratch assay) assessed (Figure 2A). For gel  
148 contraction assay, cells were evenly distributed throughout the gel during seeding and attached and  
149 spread within the gels (Supplemental Figure S4). All gels maintained structural stability for at least 48 h  
150 and no contraction was observed in the cell-free gel control (Figure 2B). The size of the cell-loaded gels  
151 from all groups followed a logarithmically decaying curve over time and, compared to the LVV-untreated  
152 control, the reduction in gel size was decreased after treatment with YF, AF, or YM LVVs and increased  
153 after treatment with AM LVVs (Figure 2C). The total contraction after 48 h was significantly higher in the  
154 AM LVV treated group, and significantly lower in the YF, AF, and YM LVV treated groups, compared to the  
155 untreated control (Figure 2D). The least contraction was observed with AF group.

156 **LVVs Affect hCF Wound Healing and Transdifferentiation:** Scratch assay demonstrated 1.5 or 2-fold  
157 enhanced wound closure over culture period after treatment of hCFs with YF, AF, and YM LVVs compared  
158 to the control, and 30% decreased wound closure after treatment with AM LVVs (Figure 2E). At the  
159 endpoint, all groups demonstrated significantly different wound closure behavior from the control, with  
160 AM LVVs having decreased closure while other groups having increased it (Figure 2F). A similar trend was  
161 observed with rat CFs (Supplemental Figure S5), although YF LVVs showed no beneficial effects on these  
162 cells. No group achieved full wound closure in the time allotted, with the YF, AF, and YM groups achieving  
163 >45% average closure, the control achieving ~37% closure, and the AM group achieving <30% closure  
164 (Supplemental Figure S6). Immunostaining of cells at 96 h post treatment revealed significant differences  
165 in  $\alpha$ -SMA expression between all groups and the control, with the YF, AF, and YM groups showing <40%  
166  $\alpha$ -SMA expression compared to ~65% expression in the control and >75% expression in the AM group

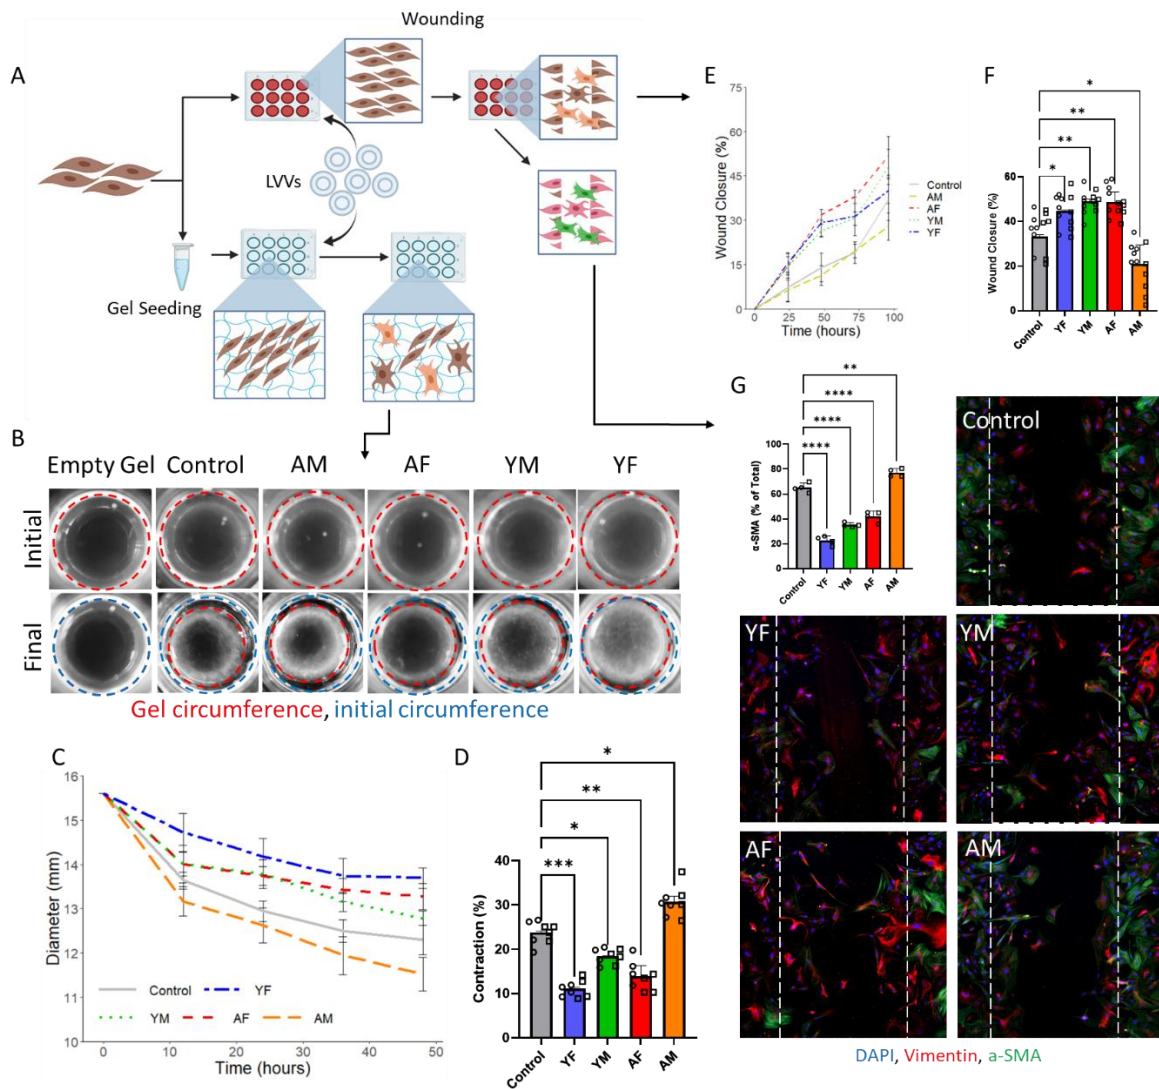

167  
 168 **Figure 2.** LVVs Modulate Fibroblast Behavior In Vitro to Control Transdifferentiation and Fibrotic Effects.  
 169 (A) Schematic briefly showing the assays performed with LVV treatment and resulting data. (B)  
 170 Representative images of gels for both baseline and final timepoints for each cohort with gel  
 171 circumference indicated, quantified as rate of gel contraction over 48 h (C) and final contraction  
 172 percentage calculated relative to initial gel diameter (D) for each cohort ( $n \geq 3$  for all LVV sources in all  
 173 cohorts). Wound closure (E) rate and (F) percentage over 96 h for each cohort ( $n \geq 3$  for all LVV sources in  
 174 all cohorts, 2 technical replicates per sample, 3 images per replicate, for 2 independent repetitions). (G)  
 175 Percentage of cells expressing  $\alpha$ -SMA for each cohort, and representative images of stained wound area  
 176 ( $n \geq 3$  for all LVV sources in all cohorts, 3 images per sample). Data are presented as the mean  $\pm$  standard  
 177 deviation. Bar graphs represent biological replicates, with technical replicates overlaid as a dot plot. \*  $p <$   
 178 0.05, \*\*  $p < 0.01$ , \*\*\*  $p < 0.001$ , assessed by one-way ANOVA with Tukey's post-hoc for (D), (F), and (G).

179 (Figure 2G). The differences observed inversely corresponded to wound healing capacity, with groups  
180 demonstrating enhanced wound healing capacity expressing lower levels of  $\alpha$ -SMA and vice-versa  
181 (Figures 2F and 2G). Greater than 95% of cells in all groups expressed vimentin, confirming them as  
182 fibroblasts (Supplemental Figure S7).

183 **Profiling of Cytokine Content:** Cytokine profiling via dot blot-based immunoassay revealed differential  
184 concentrations of cytokines present in LVVs from different subject groups. In general, when compared to  
185 YF LVVs, which had the measured lowest quantity of cytokines (Supplemental Figure S8), YM and AF LVVs  
186 showed little difference while AM LVVs showed over 3-fold higher levels of several cytokines (Figure 3A).  
187 These include Angiopoietin-2 (2.99-fold), Dkk-1 (2.58-fold), Emmprin (2.455-fold), IFN- $\gamma$  (2.84-fold), IL-1 $\alpha$   
188 (3.05-fold), Kallikrein-3 (3.31-fold), and SDF-1 $\alpha$  (2.94-fold) among others (Supplemental Table S1).  
189 Proteomapping of the affected KEGG pathways showed upregulation of transport and HIF-1, Ras, and TNF  
190 signaling, and downregulation of PPAR signaling in aged subjects compared to young, and in males  
191 compared to females (Figure 3B). Interestingly, cytosolic DNA sensing was observed in males but not  
192 females. Additionally, gene ontology analysis showed that cytokines present in the AM LVVs were  
193 associated with regulation of tissue remodeling, positive regulation of receptor-mediated endocytosis and  
194 cytokine production, and negative regulation of cell death and wound healing (Supplemental Table S2).  
195 Only male LVVs were involved in negative regulation of wound healing (Supplemental Table S2).

196 **Identification of miRNA Content:** miRNA profiling via Nanostring analysis revealed highly upregulated  
197 exosomal miRNA populations in both young groups relative to both aged groups (Figure 3C, Supplemental  
198 Figure S9). Interestingly, many of the miRNAs upregulated in YF, YM, and AF LVVs were downregulated in  
199 the AM group. From the over 800 miRNAs profiled, six were identified as both exosomal and  
200 cardioprotective from literature<sup>31-34</sup>, although the activities of these miRNAs have been primarily

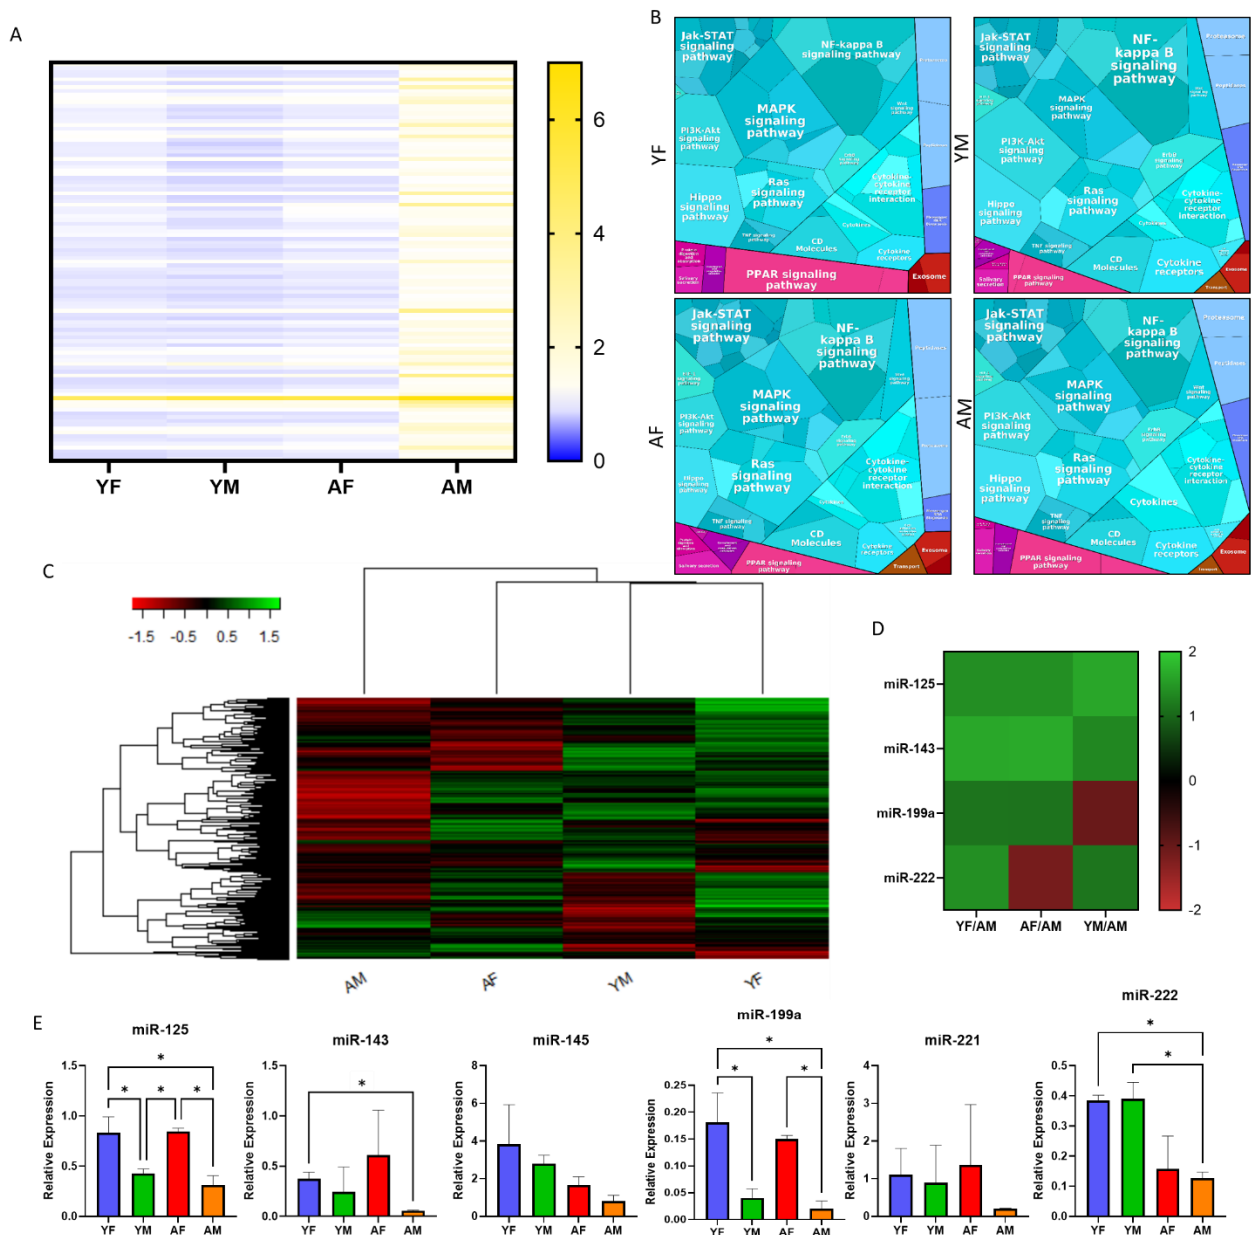

201  
 202 **Figure 3. Left Ventricular Vesicles (LVVs) Affect a Wide Variety of Aging and MI-Related Pathways**  
 203 Depending on Age and Sex. (A) Heat maps showing the cytokines detected in each cohort relative to the  
 204 internal positive control. For read data, see Supplemental Table S1. (B) Proteomaps showing the KEGG  
 205 pathways affected in response to the cytokines in each cohort. (C) Heatmap showing the full miRNA  
 206 profiling for each biological replicate of each cohort. (D) Nanostring results for the 6 identified exosomal  
 207 miRNAs from literature, for each cohort relative to AM. (E) PCR results for the identified miRNAs. Data are  
 208 presented as the mean  $\pm$  standard deviation. \*  $p < 0.05$ , assessed by one-way ANOVA with Tukey's post-  
 209 hoc for (E).

210 characterized for cardiomyocytes. Of these six, five were upregulated in other groups relative to AMs  
211 (Figure 3D). RT-qPCR revealed that four were significantly increased in at least one comparison against  
212 AM (Figure 3E), with trends being consistent with the Nanostring data. Interestingly, miR-125 and miR-  
213 199a were elevated in both female groups compared to both male groups, while miR-143 was decreased  
214 only in AM LVVs. Additionally, miR-222 was elevated in young groups compared to aged. Both miR-145  
215 and miR-221 showed no significant differences between any groups, which was unexpected as these  
216 miRNAs are often considered as conjugated units with miR-143 and miR-222, respectively.

217 ***Features of LVVs are Recapitulated in Mouse Models:*** Preliminary results had shown that LVV effects  
218 were mostly consistent between human and rat models (Figure 2F, Supplemental Figure S5), so a more  
219 controlled mouse study was conducted to further validate these results and account for the biological  
220 variability and difficulty of obtaining additional human samples. Mice (n=6) were similarly categorized as  
221 YF, YM, AF, or AM (Supplemental Table S3). The collagen contraction assay using mouse LVVs (mLVVs) and  
222 mouse CFs (mCFs) showed a similar trend to that observed from human samples, but both young groups  
223 showed no improvement compared to the untreated control, and the AM group showed no significant  
224 increase in contraction in the same comparison (Figure 4A). However, the AF-treated group showed a  
225 significant decrease in contraction compared to the control, and YF, YM, and AF groups showed a  
226 significant decrease in contraction compared to the AM group. The results from the wound healing assay  
227 followed this trend, and YM and AF, but not YF or AM, were significantly different from the control (Figure  
228 2B). However, once again the YF, YM, and AF groups showed significantly increased wound healing  
229 compared to the AM group. These results echo the preliminary results obtained from rat models  
230 (Supplemental Figure S5).

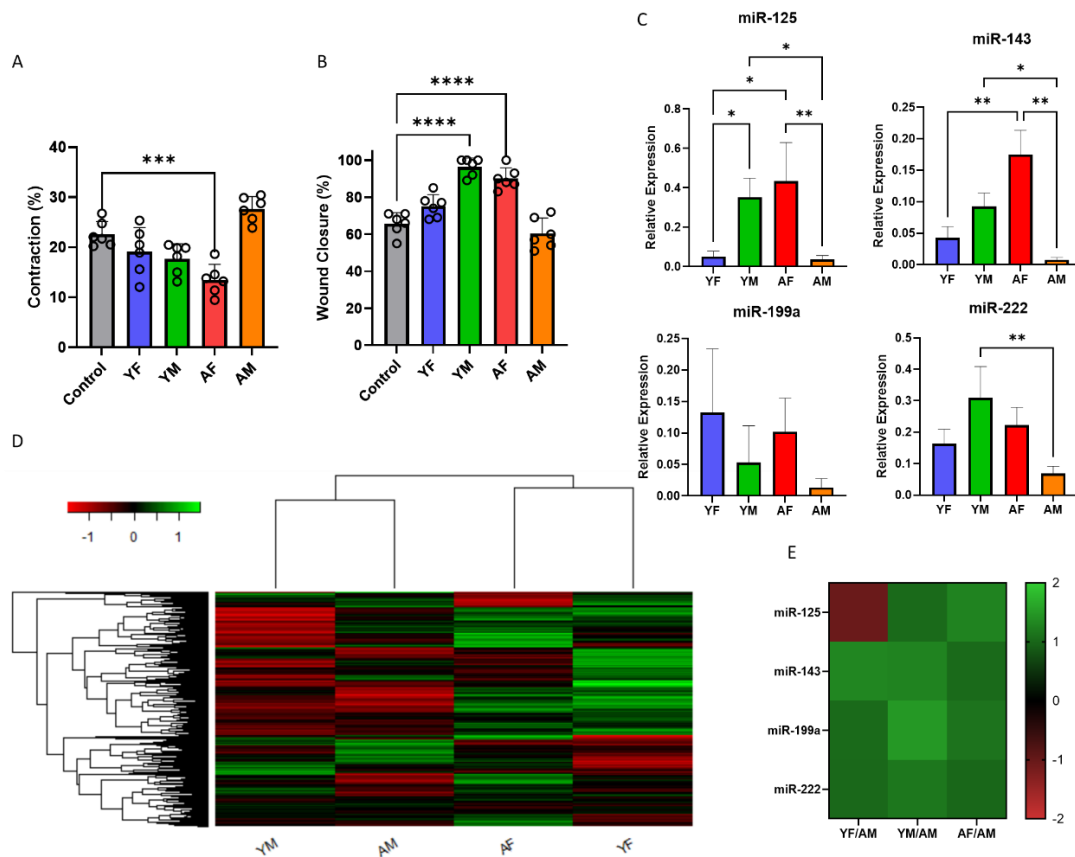

231  
 232 **Figure 4.** Validation of Trends in Human LTVs in Mouse Cardiac Model EVs. (A) Gel contraction over 48 h  
 233 for collagen hydrogels, as a percentage of initial gel diameter (n = 6 biological replicates for each cohort,  
 234 for 2 independent repetitions). (B) Wound closure over 60 h, as a percentage of initial wound area (n = 6  
 235 biological replicates for each cohort, for 2 independent repetitions). (C) PCR results for the 4 miRNAs  
 236 selected from human LTVs (n = 3 biological replicates, each pooled from 2 separate hearts' miRNA, for 2  
 237 independent repetitions). (D) Heatmap showing the full miRNA profiling for each replicate used for PCR  
 238 (each replicate is from 2 separate hearts' isolated miRNA) and (E) a heatmap for each cohort for the 4  
 239 selected miRNA targets (from the data presented in the full profiling). Data are presented as the mean  $\pm$   
 240 standard deviation. Bar graphs represent biological replicates, with individual replicates overlaid as a dot  
 241 plot. \* p < 0.05, \*\* p < 0.01, \*\*\* p < 0.001, \*\*\*\* p < 0.0005, assessed by one-way ANOVA with Tukey's  
 242 post-hoc for (A), (B), and (C).

243 Also assessed in mLVVs was the relative expression of the target miRNAs, excluding those which showed  
244 no significance in human samples. First these four targets were measured by RT-qPCR (Figure 4C). Three  
245 of the four targets showed significantly increased expression in at least one group compared to the AM  
246 cohort, with miR-199a demonstrating no significant difference between any groups. Additionally, the  
247 trends in miRNA expression slightly differed between mouse and human LVVs. This difference can likely  
248 be attributed to innate differences in mouse and human physiology and native response to cardiac insult,  
249 which may be fundamentally different<sup>35</sup>. Nevertheless, the AM group still showed the lowest expression  
250 of all four target miRNAs, and that, with the decreased in some miRNA expression observed from the YF  
251 group, is co-concurrent with mitigated benefits in contraction and wound healing. Full miRNA profiling of  
252 the mLVVs was also performed (Figure 4D). There was a higher overall upregulation of miRNAs in both  
253 female groups compared to both male groups. Interestingly, among upregulated miRNAs there was  
254 notable overlap between the YM and AF groups, although this overlap also commonly includes the YF or  
255 AM groups. The 4 selected target miRNAs pulled from the total profiling were mostly consistent with the  
256 RT-qPCR results, although for the YF group miR-125 showed downregulation compared to the AM group  
257 (Figure 4E).

258 ***miRNAs Partially Recapitulate LVV Effects:*** To study the effect of miRNAs on wound closure, cells were  
259 treated with miR-125, miR-143, miR-199a, or miR-222 mimics, or a cocktail containing all four. No  
260 significant differences were observed from treatment with individual miRNAs, although some increase in  
261 wound healing was detected after treatment with miR-125, while the miRNA cocktail-treated groups  
262 demonstrated up to three-fold greater wound closure compared to the scramble siRNA-treated control  
263 over the culture period (Figure 5A). At 48 h, the miR cocktail-treated cells had healed significantly more  
264 than scramble siRNA treated control cells. Staining of the cells (Figure 5B) revealed a significant decrease  
265 in  $\alpha$ -SMA expression of the treated cells compared to control (Figure 5C) with no change in vimentin

266 expression (Figure 5D), as was observed with LVV treatment. Quantification of Live/Dead staining (Figure  
267 5E) and BrdU staining (Figure 5F) of hCFs subjected to MI-like conditions (3 h hypoxia) showed about a  
268 2.5-fold increase in the ratio of live cells to dead cells after treatment with miRNA cocktail compared to  
269 control cells (Figure 5G), while relative BrdU expression was similar between both groups (Figure 5H).

270 **Target miRNAs Regulate Fibrosis-Related Pathways:** To assess potential convergence on fibrosis-related  
271 pathways of interest, MetaCore pathway analysis software was utilized to build networks for the selected  
272 target miRNAs. These networks identified several pathways of interest that were regulated by two or  
273 more of the selected targets. Of interest was the regulation of c-Fos by miR-199a-3p, miR-221, and,  
274 interestingly, miR-222, and downstream regulation of integrin subunit alpha 2 (ITGA2) by miR-199a-5p,  
275 which was also regulated by miR-143-3p through CD47 (Figure 5I). This same pathway also showed  
276 regulation downstream of Klotho by miR-221 and miR-125a through ATPase Na<sup>+</sup>/K<sup>+</sup> transporting subunit  
277 beta 1 (ATP1B1), and directly by miR-222. Also of interest was regulation of hexokinase 2 (HXK2) by miR-  
278 125a-5p, miR-125b-5p, miR-143-3p, miR-143-5p, miR-145-5p, and miR-199a-5p, again in parallel to c-Fos  
279 regulation (Figure 5J). Finally, DNA methyltransferase 3 alpha (DNMT3A) regulation by miR-143-3p, miR-  
280 145-5p, and miR-199a-3p, as well as downstream regulation of p21 by both forward and reverse strands  
281 of miR-125a (Figure 5K). Also interesting was the relationship between miR-143-3p and collagen type 1  
282 alpha chain 1 (COL1A1) expression. Full maps with all nodes were also recorded for each identified  
283 pathway (Supplemental Figure S10).



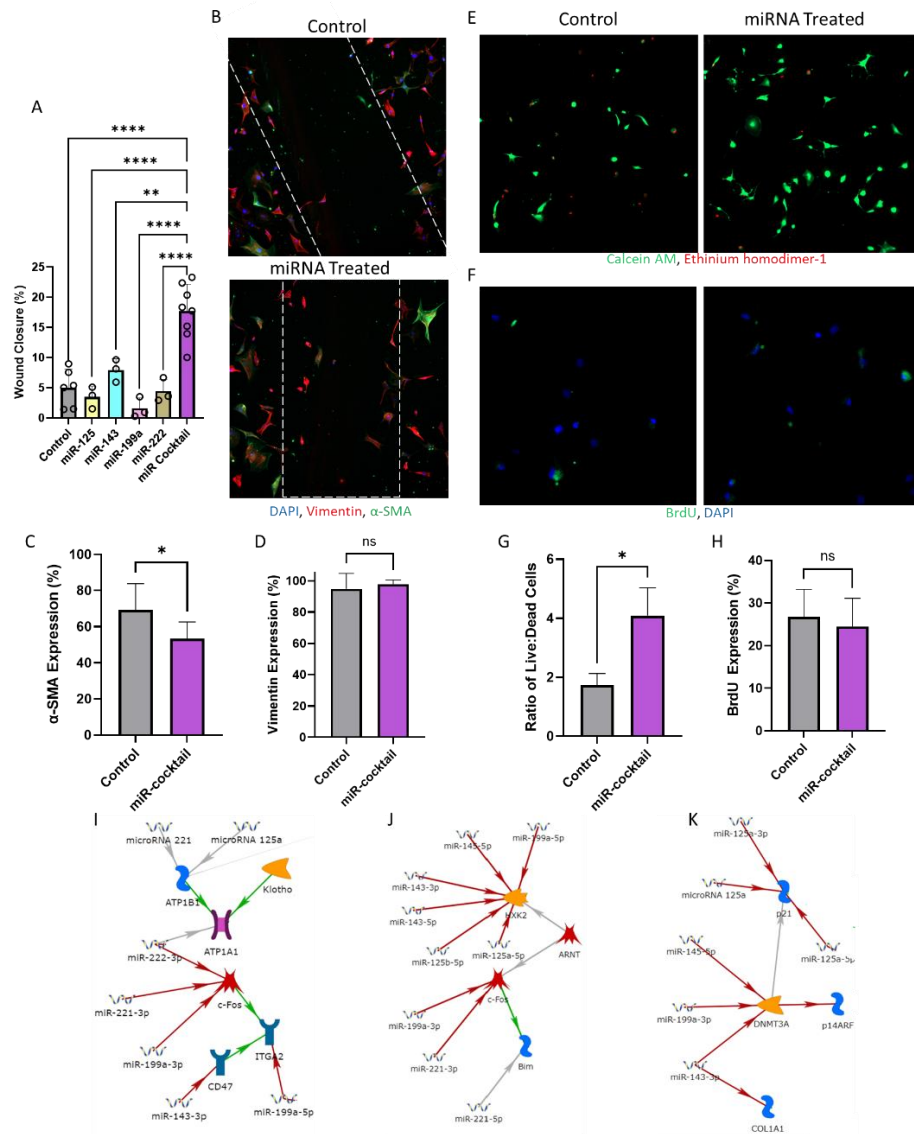

284  
 285 **Figure 5.** miRNA Treatment Partially Recapitulates LVV Effect *in vitro*. (A) Final timepoint wound closure  
 286 percentage of control and miRNA-treated groups ( $n \geq 3$ , 2 technical replicates per sample, 3 images per  
 287 replicate), with individual replicates shown as a dot plot overlay. (B) Immunostaining showing expression  
 288 of DAPI (blue),  $\alpha$ -SMA (purple), and vimentin (green) for control or miRNA-treated hCFs post-healing.  
 289 Quantification of local expression of  $\alpha$ -SMA (C) and vimentin (D) as a percentage of total cells observed.  
 290 Representative images showing (E) live/dead stain or (F) BrdU stain following MI-like hypoxia treatment  
 291 of control or miRNA-treated cells ( $n \geq 3$ , 3 images per sample). Quantification of (G) live/dead or (H) BrdU  
 292 assay. (I-J) Results of MetaCore pathways analysis for the identified target miRNA. Data are presented as  
 293 the mean  $\pm$  standard deviation. \*  $p < 0.05$ , assessed by ANOVA with Tukey's post-hoc for (A), and Student's  
 294 t-test with Welch's correction for (C), (D), (G), and (H).

## 295 DISCUSSION

296 In this study, we isolated and characterized the matrix-bound vesicles in left ventricular tissues of young  
297 (19-40 years old) and aged (50-63 years old) male and female human donors and assessed their effect on  
298 cardiac fibroblast transdifferentiation through measurement of contractility, wound healing, and  $\alpha$ -SMA  
299 expression. Interestingly, we found differences in size distribution, uptake, and cytokine and miRNA  
300 profiles between aged and young LVVs, as well as male and female LVVs. LVVs from aged hearts were  
301 smaller in size than those from young and were taken up more rapidly by cells. Additionally, LVVs from all  
302 cohorts expressed common exosome markers, showing that at least some of the isolated LVVs were  
303 exosomes. Cytokine content was higher in LVVs from aged tissues compared to young, and in males  
304 compared to females, with the highest content observed in AM LVVs. Conversely, the lowest miRNA  
305 content was observed in AM LVVs. While LVVs from females contained more miR-125 and miR-199a than  
306 LVVs from males, those from young tissues contained more miR-222 than aged. Remarkably, hCFs  
307 embedded in collagen gels showed increased contraction upon treatment with AM LVVs compared to  
308 untreated controls and decreased contraction when treated with LVVs from other groups. Similarly, *in*  
309 *vitro* scratch assay showed decreased wound closure in AM LVV treated cells compared to untreated  
310 controls and increased closure in cells treated with other LVVs groups in both human and murine cell lines.  
311 Immunostaining of cells post-scratch assay showed higher  $\alpha$ -SMA expression in AM LVV-treated cells than  
312 the control, and lower expression in other groups. Repetition of the scratch assay using miRNA treatment  
313 instead of LVVs showed that miRNA cocktail treatment, but not individual miRNAs, could recapitulate  
314 these effects. Remarkably, treatment with this cocktail showed a protective effect on hCFs subjected to  
315 MI-like conditions, significantly decreasing cell death without significantly affecting proliferation. These  
316 miRNAs were then found to be involved in the regulation of some components of fibrosis-related  
317 pathways at different points, suggesting that these miRNAs and others may work together on parallel

318 pathways in order to regulate fibrotic signaling. These results show for the first time that matrix bound  
319 EVs in the left ventricle change in size, content, and bioactivity in an age- and sex-dependent manner, and  
320 that AM LVVs may play a novel and pivotal role in chronic pro-fibrotic cardiac signaling.

321 In this study we showed for the first time the presence of exosome-like EVs in human left ventricles and  
322 characterized their size and characteristics as a function of age and sex. Interestingly, although EVs from  
323 all cohorts were in the size range of exosomes (30-200 nm)<sup>36</sup>, both young groups showed greater size and  
324 dispersity than both aged groups despite similar concentrations and measured quantity isolated. These  
325 data suggest that there is a physical difference between the LVVs present in aged ECM compared to young  
326 ECM. It is established that cell uptake of vesicles is size-dependent for exosomes<sup>37</sup>, so this may suggest a  
327 need for more rapid uptake of these exosomes for expedited response in older, more “at risk” hearts.  
328 Alternatively, the production of smaller vesicles may result from increased vesicle specialization in aged  
329 tissue<sup>23,27</sup>, although this does not explain the increased cytokine content observed in the AM LVVs. In  
330 either case, these data suggest substantial differences in exosome uptake and secretion mechanics  
331 between young and aged hearts. While the smaller, aged tissue EVs were taken up more rapidly and to a  
332 greater degree than young tissue EVs, anti-fibrotic effects were mostly conferred by young LVVs. This  
333 suggests that the miRNA-mediated effects conferred by young EVs are not intended for a rapid response  
334 or may not be highly dose-dependent. Alternatively, the detrimental effects observed from AM LVVs  
335 might result from their high cytokine content. These findings suggest a different core paracrine response  
336 to cardiac injury between young and aged, and male and female myocardium which has not been  
337 previously described in literature.

338 A general upregulation of most assessed cytokines was observed in AM LVVs compared to other cohorts,  
339 as was expected based on available data for sex<sup>38</sup> and age<sup>39</sup> dependence of cytokine profiles. Cytokines  
340 related to pro-fibrotic processes post-MI and other detrimental cardiac processes were present in greater

341 amounts in AM LVVs compared to other cohorts. While the AM cohort demonstrated the highest  
342 upregulation of inflammatory cytokines, both aged groups showed some upregulation of cytokines such  
343 as VCAM-1 and IL-1 $\beta$  (Supplemental Table S1), which are involved in further injury or fibrosis post-MI<sup>40,41</sup>.  
344 These data suggest that AM LVVs may participate in microenvironment-driven inflammaging, which has  
345 been suggested as a major contributor to cardiac fibrosis<sup>42</sup>. Some other cytokines elevated in AM LVVs,  
346 such as IFN- $\gamma$ , MMP9, and myeloperoxidase, which are involved in cardiometabolic dysfunction<sup>43</sup> and  
347 fibrotic remodeling post-MI<sup>44-46</sup>, also suggest that this contribution is greater from AM LVVs, and that AM  
348 LVVs may more directly contribute to long-term cardiac damage from the microenvironment.  
349 Interestingly, AM LVVs also demonstrated greater levels of cardioprotective cytokines than other cohorts.  
350 This may be due to endogenous ischemic preconditioning, which has been suggested to be mediated by  
351 atypical cytokine interactions<sup>47-50</sup>. Since neither AM subject suffered from CVD or other diseases which  
352 may affect the heart microenvironment or died from a heart-related cause, the observed high levels of  
353 cytokines may be a result of ongoing endogenous preconditioning. In fact, the AM group demonstrated  
354 increased GM-CSF and GDF-15, SDF-1 $\alpha$ , and TNF- $\alpha$ , which have been identified as major signaling  
355 molecules in ischemic preconditioning<sup>48,51</sup>. Overall, AM demonstrated the greatest expression of both  
356 damaging and protective cytokines.

357 A different trend was observed from miRNA analysis of six cardioprotective miRNA, with AM consistently  
358 demonstrating the lowest expression of all miRNAs assayed. This was apparent in the full miRNA profiling,  
359 where YF LVVs show the most consistent upregulation of miRNAs and AM LVVs show the most consistent  
360 downregulation of miRNAs, for all 800+ miRNAs assessed. Based on this trend, potential miRNA targets  
361 were identified by comparison of expression levels relative to AM expression to find the largest  
362 upregulation. First, targets were selected from literature and validated using the profiling data, then  
363 quantified using RT-qPCR. The targets were as follows: miR-125, shown to protect against ischemic and

364 reperfusion injury<sup>32,52</sup>, was significantly increased in female tissue LVVs in both aged and young subjects.  
365 miR-199a, a cell survival promoter and key regulator of the endothelial nitric oxide pathway<sup>31,32</sup>, was  
366 significantly increased in AF LVVs compared to both male groups. These data suggest a shift in miRNA  
367 production may be integral to differences in response to cardiac event between males and females. While  
368 miR-143, implicated in regulation of cardiac regeneration and protective against carotid injury<sup>53,54</sup>, was  
369 significantly increased in YF LVVs compared to AM, this may result from a combination of age and sex  
370 differences. Additionally, miR-222 was age-dependent, while miR-145 and miR-221 showed no significant  
371 difference between any groups. This is an interesting result particularly because miR-143 and miR-145,  
372 and miR-221 and miR-222 are often considered as conjugated pairs rather than individual miRNAs<sup>32</sup>.

373 Cell assays were selected to determine relative transdifferentiation of CF samples treated with the same  
374 concentration of LVVs from each group. These provided metrics of contractility, which is enhanced in  
375 MFs<sup>40,55</sup>, proliferation and proliferative wound healing, which are decreased in MFs<sup>55,56</sup>, and expression of  
376 characteristic MF marker  $\alpha$ -smooth muscle actin ( $\alpha$ -SMA)<sup>40</sup>. These data show that LVVs from the AM  
377 cohort tended to promote MF-like behavior from cells in both 2D and 3D culture. This is an interesting  
378 result, as existing literature suggests that the application of ECM in general tends to promote a reparative,  
379 anti-fibrotic microenvironment in the myocardium<sup>17-19</sup>. While these anti-fibrotic effects are still observed  
380 from AF LVVs and both young LVV groups, this is not the case for AM LVVs, suggesting that AM LVVs  
381 contain distinctly pro-fibrotic factors. This observation aligns with expected effects from heart tissue  
382 subjected to inflammaging effects<sup>42</sup>. Furthermore, this is supported by additional preliminary data on rat  
383 cardiac fibroblasts as well as well-controlled trials with mouse cardiac fibroblasts. In both cases, both the  
384 YM and AF groups demonstrated beneficial effects consistent with the human trials, while the AM group  
385 demonstrated pro-fibrotic effects to a comparable degree as direct TGF- $\beta$  treatment in the rat model. In  
386 the mouse model, the AM group was significantly detrimental compared to all other treatment groups,

387 further suggesting that some aspect of AM LVVs is inducing pro-fibrotic effects in direct opposition to  
388 other cohorts in this study. To further compare LVVs with human biofluid EVs, we performed WHA on EVs  
389 isolated from plasma from YF, YM, AF, and AM individuals (Supplemental Figure S11). While this assay  
390 was performed with iPSC-derived CFs, the results were consistent with the hCF WHA results and showed  
391 that LVVs demonstrated significantly increased efficacy in wound healing compared to the plasma EVs.  
392 Additional NS analysis was performed on the plasma EVs, and comparison to the LVV NS results showed  
393 that the miRNA targets identified were mostly localized to the tissue-bound LVVs, although some of the  
394 targets were found to be elevated in the female group plasma EVs. These results further demonstrate the  
395 validity of identifying miRNA targets from the tissue-bound LVVs instead of plasma EVs for the  
396 development of therapeutic strategies.

397 Further investigation of AM LVV factors may implicate novel targets for therapeutic intervention of aging-  
398 related inflammatory pathways which stimulate cardiac fibrosis. Remarkably, however, the AF, YM, and  
399 YF LVVs exhibited anti-fibrotic effects, similar to what has been observed from treatment with  
400 decellularized ECM<sup>17-19</sup>. Of these, the YF group demonstrated the greatest reduction in contractility and  
401  $\alpha$ -SMA expression, while AF LVVs promoted the greatest increase in wound healing. This is an interesting  
402 result, as LVVs from the female subjects displayed the greatest anti-fibrotic behavior overall, consistent  
403 with clinical outcomes for the onset of fibrosis. Together, these findings suggest that the beneficial effects  
404 of LVVs are sex and age-dependent, and that LVVs can recapitulate the beneficial effects of ECM or  
405 introduce pro-fibrotic factors depending on these conditions. Further investigation of these differences  
406 will help elucidate the mechanistic reason for the clinically observed importance of sex and age in the  
407 onset of cardiac fibrosis.

408 To better understand these mechanisms, we attempted to recapitulate the effects of LVV treatment by  
409 transfecting hCFs with the identified miRNAs of interest: miR-125, miR-143, miR-199a, and miR-222. While

410 transfection with individual miRNAs did not yield significant results, treatment with a combination of all  
411 four miRNAs enhanced wound healing and survivability and decreased transdifferentiation of hCFs,  
412 similarly to treatment with LVVs. Most interestingly, this miRNA cocktail exhibited these same effects  
413 under MI-mimicking conditions. Treatment more than doubled cell survivability after 3 hours of MI  
414 compared to the control while cell proliferation was nearly unchanged, suggesting that the synergistic  
415 effects of these miRNAs not only reduce damage from CVD events but also promote survival and  
416 “reparative” signaling. This is an exciting result, and indicates that novel synergistic effects of exosomal  
417 miRNAs can both inhibit the onset of cardiac fibrosis and protect cells from MI-induced cell death through  
418 endogenous pathways, although further targets must be identified to better recapitulate the full effects  
419 of LVV treatment. Similar to how the application of mesenchymal stem cell exosomes can recapitulate the  
420 cardioprotective effects of the source cells<sup>14,57</sup>, the isolation of key cardioprotective agents, such as  
421 exosomal miRNA combinations, from the ECM may allow for enhanced treatment options. By  
422 investigating key differences observed between the AM LVVs and other cohorts and common factors  
423 between AF, YM, and YF LVVs, the mysteries of the myocardial microenvironment in MI and cardiac  
424 fibrosis will be elucidated.

425 In that vein, given the success of treatment with only four miRNAs, we have identified 37 additional  
426 targets for either application or inhibition based off the miRNA profiling data (Supplemental Table S4).  
427 Specifically, 14 targets are exosomal miRNAs that display similar elevated expression against the AM  
428 group to the selected targets, while the remaining 23 are miRNAs that are elevated in the AM group  
429 compared to others. While above we have established the benefits of utilizing a synergistic cocktail of  
430 miRNAs, other single-miRNA studies have suggested that some miRNAs may also be driving factors behind  
431 the pro-inflammatory signaling and other microenvironment changes observed in the heart<sup>58</sup> and  
432 profibrotic changes observed in other organs<sup>59</sup>.

433 Beyond our own dataset, we also suggest that this data can be used to identify downstream druggable  
434 targets for both study and therapeutic intervention that are not directly implicated in this dataset. This is  
435 due to the converging of target miRNAs on several pathways which have been implicated in fibrotic  
436 signaling, such as CD47<sup>60</sup>, ITGA2<sup>61,62</sup>, c-Fos<sup>63,64</sup>, HXK2<sup>65,66</sup>, Klotho<sup>67</sup>, p21<sup>68,69</sup>, and DNMT3a<sup>70</sup>. One  
437 particularly interesting connection is that the TGF- $\beta$ -mediated effects of CD47 and ITGA2 appear  
438 downstream of c-Fos, which is known to be involved in AngII-mediated fibrosis<sup>63</sup> and can be regulated by  
439 some miRNAs to impact the onset of TGF- $\beta$ -mediated fibrosis effects<sup>64</sup> in conjunction with AngII-mediated  
440 fibrotic signaling around p21<sup>68</sup>. Additionally, the epigenetic changes implicated in fibrosis for both p21  
441 and DNMT3A related pathways appear to be mediated by miRNAs or some other paracrine pathway<sup>69-71</sup>.  
442 Further overlap occurs in the regulation of HXK2 and Klotho, which have both been shown to mediate  
443 fibrosis at least in part through regulation of the TGF- $\beta$ -Wnt axis<sup>65,67</sup>, a highly sought after regulatory  
444 pathway which is notoriously difficult to regulate. These points all demonstrate that the selected miRNAs,  
445 though limited, already demonstrate multi-point regulation of key fibrosis-mediating pathways and  
446 suggest reinforce the synergistic effects of this endogenous miRNA cocktail. By expanding our  
447 knowledgebase of which miRNAs may be contributors to this synergistic, anti-fibrotic signaling, it is  
448 possible to further refine which pathways these miRNAs may be acting on in order to better map out the  
449 process by which chronic cardiac fibrosis is mitigated endogenously to better develop targeted  
450 therapeutic strategies.

451 In this study we showed, for the first time, the presence of matrix bound exosome-like EVs in the human  
452 left ventricle, characterized the physical properties and cytokine and miRNA contents of these LVVs as a  
453 function of age and sex, and investigated the effects of these LVVs on cardiac fibroblast  
454 transdifferentiation. While recent studies have identified the therapeutic effects of young plasma-derived  
455 exosomes<sup>72,73</sup>, this study is among the first to directly compare exosomes from young and aged subjects,



456 an identified gap in knowledge regarding exosome studies<sup>4,30</sup>, and is the first to do so with exosomes  
457 derived from cardiac tissue. Additionally, this study contributes to understanding of exosome behavior in  
458 healthy hearts, which is understudied compared to the knowledgebase for exosomes from hospitalized  
459 subjects<sup>30</sup>. Furthermore, this study reveals previously undescribed synergistic effects of exosomal miRNAs  
460 in the progression of cardiac fibrosis and MI-induced damage to cardiac fibroblasts. This study expands  
461 the knowledgebase of changes in exosome behavior related to cardiac health during aging and contributes  
462 to the identification of factors involved in cardiac fibrosis and MI. These factors can be subsequently  
463 developed as a cell-free class of endogenous therapeutics, or otherwise identify highly specific therapeutic  
464 targets, that can mitigate or prevent these phenomena.

465 In conclusion, functional exosomes can be found embedded within the ECM of human left ventricular  
466 tissue, differing from exosomes traditionally isolated from biofluids. These novel left ventricular vesicles,  
467 or LVVs, contain varying quantities of cytokines and miRNA depending on sex and age, with LVVs from  
468 aged male subjects showing signs of inflammaging, ischemic preconditioning, and decreased  
469 cardioprotective miRNAs. Treatment of fibroblasts revealed that LVVs from aged males tend to promote  
470 a pro-fibrotic response, whereas LVVs from females and young males promote an anti-fibrotic response.  
471 These data suggest that ECM-embedded vesicles play a crucial role in response to cardiac injury and may  
472 be responsible for some cardioprotective effects observed with ECM treatment. Furthermore, these  
473 effects were also observed upon treatment of hCFs with a cocktail of cardioprotective miRNAs identified  
474 from the LVVs: miR-125, miR-143, miR-199a, and miR-222. This cocktail promoted cell survival under MI-  
475 like conditions *in vivo* while partially recapitulating the wound healing effects observed from LVVs. This  
476 suggests that miRNAs can mimic the effect of exosomes and possibly be used as therapeutic agents for  
477 cardiac fibrosis. However, it should be noted that physical and content characterization of the exosome  
478 populations was limited by the small number of human biological replicates available. With only up to

479 three human subjects from each cohort, it is possible that significant effects were overlooked in this study  
480 and internal variability was exacerbated. Nevertheless, further study of these interactions will enhance  
481 understanding of the mechanisms by which cardiac injury response occurs and provide novel means for  
482 intervention.

## 483 **METHODS & MATERIALS**

484 ***Tissue Preparation:*** Human heart tissue was collected from donors whose hearts were deemed unsuitable  
485 for transplantation through the Indiana Donor Network. IRB approval was waived, as no identifying  
486 information was provided by the Indiana Donor Network. All tissue collection was performed in  
487 accordance with the declaration of Helsinki. Subjects were selected such that cardiac event or  
488 cardiovascular disease was not the primary cause of death. Tissue samples consisted of young female (YF,  
489 N = 2), young male (YM, N = 3), aged female (AF, N = 3), and aged male (AM, N = 3) subjects, where subjects  
490 at or over 50 years old were considered “aged”, and those at or below 40 years old were considered  
491 “young”, with all but one YM sample falling below 30 years old (Supplemental Table S5). Samples were  
492 stored at -80 °C prior to sectioning. While still frozen, extraneous fat and connective tissue were excised.  
493 Tissue was thawed in sterile PBS at 4 °C and sectioned. Sections with approximately the same surface area  
494 and thickness (<300µm) were processed.

495 Mouse heart tissue was collected from C57BL/6J mice (The Jackson Laboratory) according to IACUC  
496 guidelines (protocol number: 18-05-4687) with the approval of the University of Notre Dame. Male and  
497 female mice were categorized as young (16 weeks old) or aged (72 weeks old), corresponding to the ages  
498 of the collected human samples (Supplementary Table S1), with each group having n = 12 samples per  
499 group (N = 48 total mice). Mice were euthanized via CO<sub>2</sub> and the whole mouse heart and other tissues  
500 were immediately harvested. All mice showed no cardiovascular abnormalities upon death or tissue  
501 isolation. Following collection, the left ventricle of the hearts were isolated and immediately processed.

502 **Decellularization:** Decellularization and digestion were performed in accordance with current standards  
503 for maintaining EV integrity<sup>74,75</sup>. Tissue sections were agitated in a solution containing peracetic acid  
504 (Sigma Aldrich, USA) (0.1%) and ethanol (Sigma Aldrich) (4%) at 200 rpm for 2 h, then in phosphate  
505 buffered saline (PBS) at 200 rpm for 2 h, and then again in peracetic acid/ethanol solution at 200 rpm for  
506 16 h. Decellularized matrix sections were then washed extensively in PBS and sterile water, blotted on a  
507 tissue paper, and frozen at -80 °C.

508 **Decellularized Matrix Digestion:** Frozen heart matrices were lyophilized overnight and ground into a  
509 powder using liquid nitrogen and pre-chilled mortar and pestle. ECM powder (200 mg) was then  
510 transferred to 1.5 mL microcentrifuge tubes, suspended in 1 mL of digestion buffer containing 0.1 mg/mL  
511 collagenase type II (Corning), 50 mM Tris buffer (Sigma Aldrich), 5 mM CaCl<sub>2</sub> (Amresco), and 200 mM of  
512 NaCl (Sigma Aldrich), and was mixed vigorously to ensure complete resuspension. The mixture was stored  
513 statically at room temperature (RT) for 24 h or until few or no solid particles could be observed in the  
514 solution, with brief remixing every 6-8 h.

515 **Vesicle Extraction and Isolation:** Digested matrix solution was centrifuged three times at 500g for 10 min,  
516 2500g for 20 min, and 10,000g for 30 min, and the pellet discarded after each centrifugation step to  
517 remove any remaining insoluble matrix remnants. The final supernatant was centrifuged at 100,000g at  
518 4°C for 70 min using an ultracentrifuge (Optima MAX-XP Tabletop Ultracentrifuge, Beckman Coulter). The  
519 pellet was either used immediately or stored dry at -80°C.

520 **Transmission Electron Microscopy:** Single pellets were fixed in 2.5% glutaraldehyde at RT in the dark, then  
521 loaded onto plasma-cleaned Formvar/carbon-coated copper 200 mesh grids (Polysciences) and negative-  
522 stained with Vanadium staining solution (Abcam, ab172780). Samples were imaged at 80 kV with a TEM  
523 (JEOL 2011, Japan).

524 **Nanoparticle Tracking Analysis:** Single pellets were resuspended in 1mL of sterile, particle-free PBS and  
525 measured using a NanoSight NS300 machine (Malvern Panalytical) and NTA software version 3.2.16. This  
526 method obtains the hemodynamic diameter and concentration of nanoparticles with diameters from 10-  
527 1000 nm in solution via Brownian motion analysis. Samples were kept at 4 °C until measurement, and  
528 measurements were taken at RT.

529 **Western Blot:** To retain maximum protein blot clarity, decellularization and matrix digestion were  
530 performed at 4°C. The pellets were lysed in RIPA buffer containing 1% proteinase inhibitor cocktail (Brand,  
531 Country) at 4°C for 30 minutes, then protein concentration was assessed via bicinchoninic acid (BCA) assay  
532 (Pierce Chemical). Equal amounts of protein were separated by 12% SDS-PAGE and transferred to blotting  
533 membranes, which were incubated overnight at 4°C with the rabbit polyclonal primary antibodies against  
534 CD9 (Abcam, ab223052), CD63 (Abcam, ab216130), TSG101 (Abcam, ab30871), Syntenin-1 (Abcam,  
535 ab19903), Vimentin (Abcam, ab137321), Connexin 43 (CX43, Abcam, ab11370), and VE-Cadherin (Abcam,  
536 ab33168) at (1:1000) dilutions, and against GRP94 (Abcam, ab3674) at 1:2000 dilution, then for 1 h at RT  
537 with HRP-conjugated goat anti-rabbit secondary antibody (Abcam, ab205718). Membranes were then  
538 exposed to a chemiluminescent substrate (Clarity ECL, Bio-Rad) and imaged using a ChemiDoc-It2 imager  
539 (UVP, Analytik Jena) equipped with VisionWorks software. Images were processed using ImageJ (NIH).

540 **Cell Culture:** Human cardiac fibroblasts (hCFs) were obtained from Cell Applications (USA) at passage 1,  
541 and cultured in Dulbecco's Modified Eagle Medium (DMEM) (Thermo Fisher) supplemented with 10% fetal  
542 bovine serum (FBS) (Gibco), 1% penicillin/streptomycin (P/S) (Life Technologies), henceforth called DMEM  
543 Complete, and 3 µM SD208, a TGF-β receptor I kinase inhibitor (Sigma Aldrich). Cells were cultured with  
544 SD208 supplement to inhibit transdifferentiation, and then used between passage 4 and 10 without  
545 SD208. Mouse cardiac fibroblasts (mCFs) were obtained from iX Cells Biotech (USA) at passage 0, and were  
546 cultured under the same conditions as hCFs.

547 **Cell Uptake of EVs:** hCFs were seeded in a 24-well plate at 50,000 cells/well to allow for imaging of small  
548 cell clusters without compromising cell viability. Three wells were seeded for each biological replicate of  
549 LVVs and an empty control. LVVs were stained with ExoGlow (System Biosciences), according to the  
550 manufacturer's protocol. Briefly, LVV content was quantified with the bicinchoninic acid (BCA) gold  
551 protein quantification assay (Thermo Fisher Scientific), and 25 µg of LVVs was obtained from each sample  
552 and resuspended in 12 µL of provided reaction buffer. After, 2 µL of stain was added and allowed to react  
553 for 30 min at RT. Stained LVVs or an empty control were then isolated in a provided gradient column and  
554 resuspended in 2mL of DMEM with 1% P/S, according to the manufacturer's protocol, for a final  
555 concentration of 12.5 µg/mL. During this, hCFs were incubated with Cell Tracker Green (Thermo Fisher) in  
556 PBS for 30 min at 37°C. Stained cells were incubated in DMEM with 1% P/S with one group of LVVs or the  
557 control at 37°C for 24 h, and imaged at 3, 8, 16, and 24 h of incubation. Before imaging, the conditioned  
558 media from each well was moved to a sterile container and the cells were washed with PBS. Cells were  
559 imaged in PBS, and the removed media was replaced after imaging.

560 **Gel Contraction Assay:** Collagen solution (1.5 mg/mL) was prepared by mixing rat tail collagen (9.33  
561 mg/mL, Corning), 10x PBS, deionized (DI) water, and DMEM with 1% P/S at 2:1:8:3 ratio in a final volume  
562 of 250 µL. Immediately before seeding, pH was adjusted to 7.4 with 1 M NaOH. All steps up to the addition  
563 of cells were performed on ice to prevent premature gelation. Cells were washed with PBS, detached from  
564 flasks using trypsin-EDTA (0.25%), and then resuspended at 1.5 million cells/mL in DMEM with 1% P/S.  
565 Cell suspension was mixed thoroughly with the collagen solution at 1:1 ratio. The mixture was transferred  
566 into a 24-well plate (300 µL/well) and incubated at 37 °C for 2 h to allow for gel formation. In addition to  
567 five cell-encapsulated gels, one cell-free gel (loaded with FBS-free DMEM Complete without cells,  
568 henceforth gel control) was included. Gels were then incubated in FBS-free DMEM Complete  
569 supplemented with 12.5 µg/mL LVVs from one group, or a PBS blank containing no LVVs (control). The gel

570 control was fed with control media. Images were taken every 12 h for 48 h and the diameter of the gel  
571 was measured along two sets of orthogonal axes. This experiment was repeated twice (3 repetitions total)  
572 for each of the biological replicates for all cohorts.

573 **Wound Healing Assay:** Cells were seeded onto a 24-well plate at a density of  $2 \times 10^5$  cells per well and  
574 allowed to grow to >90% confluency. Once confluent, cells were washed with PBS and subjected to a  
575 vertical wound by gently dragging a 1000  $\mu$ L pipette tip across the monolayer. Wells were assessed under  
576 the microscope to ensure successful and consistent wounding. Typical wound width was approximately  
577 600  $\mu$ m. The cells were then incubated in FBS-free DMEM Complete supplemented with 12.5  $\mu$ g/mL LVV  
578 or a PBS blank containing no LVVs (control). The wounds were then imaged immediately and every  
579 subsequent 24 h for 96 h. Cells were incubated at 37 °C between imaging, and media was replaced after  
580 48 h. Wound healing was assessed using ImageJ by percent reduction in wound width in three locations  
581 over time. This experiment was performed twice (2 repetitions total) for each biological replicate for all  
582 cohorts.

583 **Immunostaining:** At 96 h post-wounding, cells were washed with PBS and incubated in 4%  
584 paraformaldehyde for 15 min, then in 0.1% Triton X-100 for 30 min, and then in 10% goat serum for 2 h,  
585 all at RT and with PBS washes after each step. Cells were next incubated with rabbit anti-vimentin (Abcam)  
586 and mouse anti- $\alpha$ -SMA (Abcam) primary antibodies (dilution: 1:100 in 5% goat serum) at 4 °C overnight.  
587 The cells were then washed and incubated with Alexa Fluor 647-labelled anti-rabbit IgG and Alexa Fluor  
588 488-labelled anti-mouse IgG secondary antibodies (dilution: 1:200 in 5% goat serum) at 4°C for 6 h. Finally,  
589 the cells were incubated with DAPI (dilution: 1:1000 in PBS) for 15 minutes at RT and imaged with a  
590 fluorescent microscope (Axio Observer.Z1, Zeiss).

591 **Profiling of Cytokines:** To remove any residual extraneous proteins, samples were purified using the CD9  
592 Exo-Flow Capture Kit (System Biosciences) using the manufacturer-provided protocol. Briefly, the pellet

593 was resuspended in a solution of biotin-conjugated CD9 antibody and streptavidin-coupled magnetic  
594 beads overnight at 4 °C. LVVs were isolated magnetically and washed, then eluted from the magnetic  
595 beads. The LVV solution was worked up to 1% Triton X-100 and left at 4 °C overnight. The lysed LVV  
596 solution was assessed using the Proteome Profiler Human XL Cytokine Array Kit (R&D Systems) as  
597 described previously<sup>76,77</sup>, for detection of 111 cytokines (Supplemental Figure S8, Supplemental Table S6).  
598 Briefly, nitrocellulose membranes with the immobilized antibodies against 111 cytokines were blocked  
599 according to manufacturer's instructions and incubated overnight at 4 °C with equal concentrations of  
600 proteins, determined by BCA assay, from each sample. Membranes were then washed and incubated with  
601 antibody cocktail solution for 1 h, with streptavidin-horseradish peroxidase (HRP) for 30 min, and with the  
602 Chemiluminescence reagent mix for 1 min. Membranes were then imaged with a biomolecular imager  
603 (ImageQuant LAS4000, GE Healthcare) using X-ray exposure for 5-10 min. Relative cytokine content was  
604 determined by blot intensity analysis in ImageJ.

605 Gene Ontology Analysis (GOA) was performed on the obtained relative expression data. Comprehensive  
606 analysis was performed using an online database via PANTHER Gene Ontology classification for biological  
607 processes and enrichment analysis<sup>78-80</sup>. Data was extracted from the output dataset and graphed using R.  
608 Proteomic interactions of the same relative expression data were also classified through KEGG-based  
609 proteomapping software<sup>81</sup> and are presented as obtained.

610 **miRNA Isolation:** RNA was isolated from LVVs using the Total Exosome RNA & Protein Isolation Kit  
611 (Thermo Fisher Scientific). Briefly, isolated LVVs were resuspended in exosome resuspension buffer and  
612 incubated with an equal volume of denaturation solution at 4 °C for 5 min. The solution was then mixed  
613 with an equal volume of Acid-Phenol:Chloroform by vortexing for 30 seconds and centrifuged for 5 min  
614 at 15,000g. The resulting aqueous phase was extracted and combined with 1.25x volume of 100% ethanol,  
615 then transferred to the provided spin column. The spin column was centrifuged at 10,000g for 15 seconds

616 to bind and wash the RNA, then the RNA was eluted in the provided elution solution and quantified via a  
617 microvolume spectrophotometer (Nanodrop 2000, Thermo Fisher Scientific).

618 **Profiling of Total miRNA Population:** Immediately following isolation, the eluted miRNA was  
619 concentrated using 3 kDa microcentrifuge spin filters (Amicon). Briefly, the 100  $\mu$ L miRNA solution was  
620 worked up to 420  $\mu$ L with RNase-free water and placed into a filter, then centrifuged at 14,000g for 90  
621 minutes. Next, the filter was inverted into a fresh collection tube, and centrifuged at 8,000g for 2 minutes.  
622 The resulting isolate is 20-25  $\mu$ L of concentrated miRNA, which was quantified by a microvolume  
623 spectrophotometer. Concentrated miRNA was then prepared for miRNA profiling (NanoString) according  
624 to the manufacturer's protocol. Briefly, the provided miRNA codeset was mixed with the provided  
625 hybridization buffer to produce a master mix, and spike-in miRNA controls were prepared at 200 pm. In  
626 order, the master mix, concentrated sample miRNA, spike-in miRNA, and provided probes were mixed in  
627 a PCR plate and incubated at 65 °C for 16 h. The hybridized solution was then mixed with 15  $\mu$ L of provided  
628 hybridization buffer, for a total volume of 30-35  $\mu$ L, and added to the provided microfluidic cartridge. The  
629 assay was run with the provided protocol for total miRNA analysis, and data was processed and analyzed  
630 using the provided software using the recommended settings.

631 **miRNA PCR:** Isolated miRNA content was quantified by real time quantitative PCR (RT-qPCR) using the  
632 miScript PCR Kit (Qiagen) with a CFX Connect Real-Time system (Bio-Rad). cDNA was prepared from 100  
633 ng of RNA template, and the primers used were hsa-miR-125b-5p, hsa-miR-143-3p, hsa-miR-145-5p, hsa-  
634 miR-199a-3p, hsa-miR-221-3p, and hsa-miR-222-3p (Supplemental Table S7). Results were quantified  
635 relative to RNU6B, the recommended control. Non template controls were also used, and no signal was  
636 detected from these controls.

637 **miRNA Transfection:** hCFs were seeded and wounded as above for the wound healing assay. After  
638 wounding, cells were incubated with DMEM miRNA transfection media with either a cocktail of mimics of



639 identified miRNA of interest (miR-125, ACGGGUUAGGCUCUUGGGAGCU; miR-143,  
640 UGAGAUGAAGCACUGUAGCUC; miR-199a, ACAGUAGUCUGCACAUUGGUUA; miR-222,  
641 AGCUACAUCUGGCUACUGGGU; all miRvana) or a scramble miRNA control (Negative Control #2,  
642 Ambion) at 40 nM. Transfection media was prepared with Lipofectamine 3000 according to the  
643 manufacturer's specifications. Imaging and analysis were performed as above. After wounding, the  
644 transfected cells were fixed, stained and imaged as above in immunostaining. Two independent  
645 experiments with N = 3 biological replicates each were performed, with the later fixed at 48 h due to the  
646 high rates of cell death observed beyond that time point.

647 **Hypoxia Assay:** hCFs were seeded as above for miRNA transfection assays and transfected with the  
648 mentioned miRNAs for 24 hours to maximize miRNA uptake and minimize cell death. Randomly selected  
649 plates were also incubated with BrdU (Abcam, 10  $\mu$ M) for proliferation assessment. Following this, hCFs  
650 were transferred to deoxygenated glucose-free media (RPMI, Thermo Fisher) and subjected to hypoxia  
651 for 3 hours, which we have previously shown is sufficient to induce MI-like cell death<sup>77</sup>. BrdU-treated  
652 plates were subsequently fixed and prepared for staining as described in immunostaining, and stained  
653 with anti-BrdU (Abcam), while non-BrdU plates were stained with calcein AM and ethidium homodimer-  
654 1 Live/Dead stains (Invitrogen, 1:1000) to quantify living and dead cells, respectively. Stained cells were  
655 imaged as in immunostaining, and images were quantified in ImageJ.

656 **miRNA Pathway Analysis:** Nanostring data was normalized via Log10 normalization, and uploaded to the  
657 Clarivate MetaCore system for pathway analysis. miRNAs were identified by miRBase IDs. Analysis was  
658 conducted on the identified target miRNAs to construct a custom network. Automated network analysis  
659 was conducted with 50 nodes per network. Results were presented as pathways obtained from the  
660 software.

661 **Statistical Analysis:** Results were analyzed by one-way analysis of variance (ANOVA) with post-hoc Tukey's  
662 HSD, two-way ANOVA with post-hoc Tukey's multiple comparison test, or a two-tailed Student's t-test  
663 with Welch's correction for unequal standard deviation. Values are presented as the mean  $\pm$  standard  
664 deviation (SD) unless otherwise indicated, and differences were considered significant when  $p \leq 0.05$ .

## 665 **ACKNOWLEDGEMENTS**

666 The lyophilization of decellularized ECM was conducted at the Center for Environmental Science and  
667 Technology (CEST) at the University of Notre Dame.

668 We thank the Biophysics Instrumentation (BIC) Core Facility for the use of Optima MAX-XP Tabletop  
669 Ultracentrifuge.

670 The authors acknowledge the use of the Electron Microscopy Core of the Notre Dame Integrated Imaging  
671 Facility, a designated core of the NIH-funded Indiana Clinical and Translational Sciences Institute.

672 The Nanoparticle Tracking Analysis was conducted using the NanoSight NS300 at the Harper Cancer  
673 Research Institute (HCRI) Tissue Core Facility.

674 The schematics in some figures were created using BioRender.com

675 We thank Stanley Cheng, Zorlutuna Lab manager, for assisting in proofreading this manuscript prior to  
676 submission

## 677 **AUTHOR CONTRIBUTIONS**

678 G.R., G.B., J.Y., and P.Z. designed research, G.R. performed research, G.R. analyzed data, G.B. and P.Z.  
679 conducted review and editing, P.Z. provided funding, project administration, and resources, G.R. wrote  
680 the paper.

681

682    **REFERENCES**

- 683    1.    Rahimi, K., Duncan, M., Pitcher, A., Emdin, C. A. & Goldacre, M. J. Mortality from heart failure,  
684    acute myocardial infarction and other ischaemic heart disease in England and Oxford: a trend  
685    study of multiple-cause-coded death certification. *J Epidemiol Community Health* **69**, 1000–1005  
686    (2015).
- 687    2.    Law, M. R., Watt, H. C. & Wald, N. J. The underlying risk of death after myocardial infarction in  
688    the absence of treatment. *Arch Intern Med* **162**, 2405–2410 (2002).
- 689    3.    di Franco, S., Amarelli, C., Montalto, A., Loforte, A. & Musumeci, F. Biomaterials and heart  
690    recovery: cardiac repair, regeneration and healing in the MCS era: a state of the ‘heart’. *J Thorac*  
691    *Dis* **10**, S2346–S2362 (2018).
- 692    4.    D’Anca, M. *et al.* Exosome Determinants of Physiological Aging and Age-Related  
693    Neurodegenerative Diseases. *Front Aging Neurosci* **11**, 232 (2019).
- 694    5.    Yusuf, S. *et al.* Effect of potentially modifiable risk factors associated with myocardial infarction in  
695    52 countries (the INTERHEART study): case-control study. *Lancet* **364**, 937–952 (2004).
- 696    6.    Anand, S. S. *et al.* Risk factors for myocardial infarction in women and men: insights from the  
697    INTERHEART study. *Eur Heart J* **29**, 932–940 (2008).
- 698    7.    Florio, M. C., Magenta, A., Beji, S., Lakatta, E. G. & Capogrossi, M. C. Aging, MicroRNAs, and Heart  
699    Failure. *Curr Probl Cardiol* **45**, 100406 (2020).
- 700    8.    Vaccarino, V. *et al.* Sex differences in mortality after acute myocardial infarction: changes from  
701    1994 to 2006. *Arch Intern Med* **169**, 1767–1774 (2009).
- 702    9.    Vaccarino, V., Krumholz, H. M., Yarzebski, J., Gore, J. M. & Goldberg, R. J. Sex differences in 2-  
703    year mortality after hospital discharge for myocardial infarction. *Ann Intern Med* **134**, 173–181  
704    (2001).
- 705    10.    Kessler, E. L., Rivaud, M. R., Vos, M. A. & van Veen, T. A. B. Sex-specific influence on cardiac  
706    structural remodeling and therapy in cardiovascular disease. *Biol Sex Differ* **10**, 7 (2019).
- 707    11.    Piccinini, A. M. & Midwood, K. S. Illustrating the interplay between the extracellular matrix and  
708    microRNAs. *Int J Exp Pathol* **95**, 158–180 (2014).
- 709    12.    Basara, G., Ozcebe, S. G., Ellis, B. W. & Zorlutuna, P. Tunable Human Myocardium Derived  
710    Decellularized Extracellular Matrix for 3D Bioprinting and Cardiac Tissue Engineering. *Gels* **7**,  
711    (2021).
- 712    13.    Fields, L. *et al.* Epicardial placement of human MSC-loaded fibrin sealant films for heart failure:  
713    preclinical efficacy and mechanistic data. *Mol Ther* (2021) doi:10.1016/j.ymthe.2021.04.018.
- 714    14.    Huang, K. *et al.* An off-the-shelf artificial cardiac patch improves cardiac repair after myocardial  
715    infarction in rats and pigs. *Sci Transl Med* **12**, (2020).

- 716 15. Zhang, D. *et al.* Tissue-engineered cardiac patch for advanced functional maturation of human  
717 ESC-derived cardiomyocytes. *Biomaterials* **34**, 5813–5820 (2013).
- 718 16. Zhu, D. *et al.* Minimally invasive delivery of therapeutic agents by hydrogel injection into the  
719 pericardial cavity for cardiac repair. *Nat Commun* **12**, 1412 (2021).
- 720 17. Christman, K. L. *et al.* Injectable fibrin scaffold improves cell transplant survival, reduces infarct  
721 expansion, and induces neovasculature formation in ischemic myocardium. *J Am Coll Cardiol* **44**,  
722 654–660 (2004).
- 723 18. Traverse, J. H. *et al.* First-in-Man Study of a Cardiac Extracellular Matrix Hydrogel in Early and  
724 Late Myocardial Infarction Patients. *JACC Basic Transl Sci* **4**, 659–669 (2019).
- 725 19. Johnson, T. D., Braden, R. L. & Christman, K. L. Injectable ECM scaffolds for cardiac repair.  
726 *Methods Mol Biol* **1181**, 109–120 (2014).
- 727 20. Sicari, B. M. *et al.* The promotion of a constructive macrophage phenotype by solubilized  
728 extracellular matrix. *Biomaterials* **35**, 8605–8612 (2014).
- 729 21. Yap, J., Cabrera-Fuentes, H. A., Irei, J., Hausenloy, D. J. & Boisvert, W. A. Role of Macrophages in  
730 Cardioprotection. *Int J Mol Sci* **20**, (2019).
- 731 22. Zgheib, C., Xu, J. & Liechty, K. W. Targeting Inflammatory Cytokines and Extracellular Matrix  
732 Composition to Promote Wound Regeneration. *Adv Wound Care (New Rochelle)* **3**, 344–355  
733 (2014).
- 734 23. Xu, M. Y., Ye, Z. S., Song, X. T. & Huang, R. C. Differences in the cargos and functions of exosomes  
735 derived from six cardiac cell types: a systematic review. *Stem Cell Res Ther* **10**, 194 (2019).
- 736 24. Dubnika, A. *et al.* Cytokines as therapeutic agents and targets in heart disease. *Cytokine Growth*  
737 *Factor Rev* **43**, 54–68 (2018).
- 738 25. Mehra, V. C., Ramgolam, V. S. & Bender, J. R. Cytokines and cardiovascular disease. *J Leukoc Biol*  
739 **78**, 805–818 (2005).
- 740 26. Huleihel, L. *et al.* Matrix-bound nanovesicles within ECM bioscaffolds. *Sci Adv* **2**, (2016).
- 741 27. Yáñez-Mó, M. *et al.* Biological properties of extracellular vesicles and their physiological  
742 functions. *J Extracell Vesicles* **4**, 27066 (2015).
- 743 28. An, M. *et al.* Extracellular matrix-derived extracellular vesicles promote cardiomyocyte growth  
744 and electrical activity in engineered cardiac atria. *Biomaterials* **146**, 49–59 (2017).
- 745 29. Huleihel, L. *et al.* Matrix-Bound Nanovesicles Recapitulate Extracellular Matrix Effects on  
746 Macrophage Phenotype. *Tissue Eng Part A* **23**, 1283–1294 (2017).
- 747 30. Eitan, E. *et al.* Age-Related Changes in Plasma Extracellular Vesicle Characteristics and  
748 Internalization by Leukocytes. *Sci Rep* **7**, 1342 (2017).

- 749 31. Joris, V. *et al.* MicroRNA-199a-3p and MicroRNA-199a-5p Take Part to a Redundant Network of  
750 Regulation of the NOS (NO Synthase)/NO Pathway in the Endothelium. *Arterioscler Thromb Vasc*  
751 *Biol* **38**, 2345–2357 (2018).
- 752 32. Lee, D. S. *et al.* Defined MicroRNAs Induce Aspects of Maturation in Mouse and Human  
753 Embryonic-Stem-Cell-Derived Cardiomyocytes. *Cell Rep* **12**, 1960–1967 (2015).
- 754 33. Ottaviani, L., Sansonetti, M. & da Costa Martins, P. A. Myocardial cell-to-cell communication via  
755 microRNAs. *Noncoding RNA Res* **3**, 144–153 (2018).
- 756 34. Prathipati, P., Nandi, S. S. & Mishra, P. K. Stem Cell-Derived Exosomes, Autophagy, Extracellular  
757 Matrix Turnover, and miRNAs in Cardiac Regeneration during Stem Cell Therapy. *Stem Cell Rev*  
758 *Rep* **13**, 79–91 (2017).
- 759 35. Perel, P. *et al.* Comparison of treatment effects between animal experiments and clinical trials:  
760 systematic review. *BMJ* **334**, 197 (2007).
- 761 36. Yang, J., Bahcecioglu, G. & Zorlutuna, P. The Extracellular Matrix and Vesicles Modulate the  
762 Breast Tumor Microenvironment. *Bioengineering (Basel)* **7**, (2020).
- 763 37. Caponnetto, F. *et al.* Size-dependent cellular uptake of exosomes. *Nanomedicine* **13**, 1011–1020  
764 (2017).
- 765 38. Wang, M., Baker, L., Tsai, B. M., Meldrum, K. K. & Meldrum, D. R. Sex differences in the  
766 myocardial inflammatory response to ischemia-reperfusion injury. *Am J Physiol Endocrinol Metab*  
767 **288**, E321-6 (2005).
- 768 39. Rea, I. M. *et al.* Age and Age-Related Diseases: Role of Inflammation Triggers and Cytokines. *Front*  
769 *Immunol* **9**, (2018).
- 770 40. Baum, J. & Duffy, H. S. Fibroblasts and myofibroblasts: what are we talking about? *J Cardiovasc*  
771 *Pharmacol* **57**, 376–379 (2011).
- 772 41. Bujak, M. & Frangogiannis, N. G. The role of IL-1 in the pathogenesis of heart disease. *Arch*  
773 *Immunol Ther Exp (Warsz)* **57**, 165–176 (2009).
- 774 42. Wang, M. & Shah, A. M. Age-associated pro-inflammatory remodeling and functional phenotype  
775 in the heart and large arteries. *J Mol Cell Cardiol* **83**, 101–111 (2015).
- 776 43. Ndrepepa, G. Myeloperoxidase - A bridge linking inflammation and oxidative stress with  
777 cardiovascular disease. *Clin Chim Acta* **493**, 36–51 (2019).
- 778 44. Ma, F. *et al.* Macrophage-stimulated cardiac fibroblast production of IL-6 is essential for TGF  
779  $\beta$ /Smad activation and cardiac fibrosis induced by angiotensin II. *PLoS One* **7**, e35144 (2012).
- 780 45. Schafer, S. *et al.* IL-11 is a crucial determinant of cardiovascular fibrosis. *Nature* **552**, 110–115  
781 (2017).
- 782 46. Yabluchanskiy, A., Ma, Y., Iyer, R. P., Hall, M. E. & Lindsey, M. L. Matrix metalloproteinase-9:  
783 Many shades of function in cardiovascular disease. *Physiology (Bethesda)* **28**, 391–403 (2013).

- 784 47. Bernhagen, J. Protective cardiac conditioning by an atypical cytokine. *Clin Sci (Lond)* **133**, 933–937  
785 (2019).
- 786 48. Dewitte, K. *et al.* Role of oxidative stress, angiogenesis and chemo-attractant cytokines in the  
787 pathogenesis of ischaemic protection induced by remote ischaemic conditioning: Study of a  
788 human model of ischaemia-reperfusion induced vascular injury. *Pathophysiology* **26**, 53–59  
789 (2019).
- 790 49. Fan, Z. & Guan, J. Antifibrotic therapies to control cardiac fibrosis. *Biomater Res* **20**, 13 (2016).
- 791 50. Jahangir, A., Sagar, S. & Terzic, A. Aging and cardioprotection. *J Appl Physiol (1985)* **103**, 2120–  
792 2128 (2007).
- 793 51. Shimizu, M. *et al.* Remote ischemic preconditioning decreases adhesion and selectively modifies  
794 functional responses of human neutrophils. *J Surg Res* **158**, 155–161 (2010).
- 795 52. Varga, Z. v, Ágg, B. & Ferdinandy, P. miR-125b is a protectomiR: A rising star for acute  
796 cardioprotection. *J Mol Cell Cardiol* **115**, 51–53 (2018).
- 797 53. Ma, W. Y. *et al.* Melatonin promotes cardiomyocyte proliferation and heart repair in mice with  
798 myocardial infarction via miR-143-3p/Yap/Ctnd1 signaling pathway. *Acta Pharmacol Sin* **42**,  
799 921–931 (2021).
- 800 54. Zhao, W., Zhao, S. P. & Zhao, Y. H. MicroRNA-143/-145 in Cardiovascular Diseases. *Biomed Res Int*  
801 **2015**, 531740 (2015).
- 802 55. Li, B. & Wang, J. H. Fibroblasts and myofibroblasts in wound healing: force generation and  
803 measurement. *J Tissue Viability* **20**, 108–120 (2011).
- 804 56. Vaughan, M. B., Odejimi, T. D., Morris, T. L., Sawalha, D. & Spencer, C. L. A new bioassay  
805 identifies proliferation ratios of fibroblasts and myofibroblasts. *Cell Biol Int* **38**, 981–986 (2014).
- 806 57. Liu, B. *et al.* Cardiac recovery via extended cell-free delivery of extracellular vesicles secreted by  
807 cardiomyocytes derived from induced pluripotent stem cells. *Nat Biomed Eng* **2**, 293–303 (2018).
- 808 58. Kishore, A., Borucka, J., Petrakova, J. & Petrek, M. Novel insights into miRNA in lung and heart  
809 inflammatory diseases. *Mediators Inflamm* **2014**, 259131 (2014).
- 810 59. Noetel, A., Kwiecinski, M., Elfimova, N., Huang, J. & Odenthal, M. microRNA are Central Players in  
811 Anti- and Profibrotic Gene Regulation during Liver Fibrosis. *Front Physiol* **3**, 49 (2012).
- 812 60. Li, Y. *et al.* CD47 antibody suppresses isoproterenol-induced cardiac hypertrophy through  
813 activation of autophagy. *Am J Transl Res* **12**, 5908 (2020).
- 814 61. Humeres, C. *et al.* Smad7 effects on TGF- $\beta$  and ErbB2 restrain myofibroblast activation and  
815 protect from postinfarction heart failure. *J Clin Invest* **132**, (2022).
- 816 62. Khalil, H. *et al.* Fibroblast-specific TGF- $\beta$ –Smad2/3 signaling underlies cardiac fibrosis. *J Clin Invest*  
817 **127**, 3770–3783 (2017).

- 818 63. Huang, D., Wang, Y., Yang, C., Liao, Y. & Huang, K. Angiotensin II promotes poly(ADP-ribosyl)ation  
819 of c-Jun/c-Fos in cardiac fibroblasts. *J Mol Cell Cardiol* **46**, 25–32 (2009).
- 820 64. Pan, Z. *et al.* MicroRNA-101 inhibited postinfarct cardiac fibrosis and improved left ventricular  
821 compliance via the FBJ osteosarcoma oncogene/transforming growth factor- $\beta$ 1 pathway.  
822 *Circulation* **126**, 840–850 (2012).
- 823 65. Sun, J. *et al.* aFGF alleviates diabetic endothelial dysfunction by decreasing oxidative stress via  
824 Wnt/ $\beta$ -catenin-mediated upregulation of HXK2. *Redox Biol* **39**, 101811 (2021).
- 825 66. Mei, L. *et al.* Fibroblast growth factor 7 alleviates myocardial infarction by improving oxidative  
826 stress via PI3K $\alpha$ /AKT-mediated regulation of Nrf2 and HXK2. *Redox Biol* **56**, 102468 (2022).
- 827 67. Liu, Q. *et al.* The axis of local cardiac endogenous Klotho-TGF- $\beta$ 1-Wnt signaling mediates cardiac  
828 fibrosis in human. *J Mol Cell Cardiol* **136**, 113–124 (2019).
- 829 68. Yuan, J. *et al.* Inhibition of Wdr5 Attenuates Ang-II-Induced Fibroblast-to-Myofibroblast  
830 Transition in Cardiac Fibrosis by Regulating Mdm2/P53/P21 Pathway. *Biomolecules* **12**, 1574  
831 (2022).
- 832 69. Qi, H. *et al.* Activation of AMPK Attenuated Cardiac Fibrosis by Inhibiting CDK2 via p21/p27 and  
833 miR-29 Family Pathways in Rats. *Mol Ther Nucleic Acids* **8**, 277–290 (2017).
- 834 70. Zhao, K. *et al.* Low-intensity pulsed ultrasound prevents prolonged hypoxia-induced cardiac  
835 fibrosis through HIF-1 $\alpha$ /DNMT3a pathway via a TRAAK-dependent manner. *Clin Exp Pharmacol*  
836 *Physiol* **48**, 1500–1514 (2021).
- 837 71. Shumliakivska, M. *et al.* DNMT3A clonal hematopoiesis-driver mutations induce cardiac fibrosis  
838 by paracrine activation of fibroblasts. *bioRxiv* 2023.01.07.521766 (2023)  
839 doi:10.1101/2023.01.07.521766.
- 840 72. Lee, B. R., Kim, J. H., Choi, E. S., Cho, J. H. & Kim, E. Effect of young exosomes injected in aged  
841 mice. *Int J Nanomedicine* **13**, 5335–5345 (2018).
- 842 73. Wang, W. *et al.* Extracellular vesicles extracted from young donor serum attenuate inflammaging  
843 via partially rejuvenating aged T-cell immunotolerance. *FASEB J* fj201800059R (2018)  
844 doi:10.1096/fj.201800059R.
- 845 74. Théry, C. *et al.* Minimal information for studies of extracellular vesicles 2018 (MISEV2018): a  
846 position statement of the International Society for Extracellular Vesicles and update of the  
847 MISEV2014 guidelines. *J Extracell Vesicles* **7**, 1535750 (2018).
- 848 75. Webber, J. & Clayton, A. How pure are your vesicles? *J Extracell Vesicles* **2**, (2013).
- 849 76. Bahcecioglu, G. *et al.* Aged Breast Extracellular Matrix Drives Mammary Epithelial Cells to an  
850 Invasive and Cancer-Like Phenotype. *bioRxiv* 2020.09.30.320960 (2020)  
851 doi:10.1101/2020.09.30.320960.

- 852 77. Ozcebe, S. G., Bahcecioglu, G., Yue, X. S. & Zorlutuna, P. Effect of cellular and ECM aging on  
853 human iPSC-derived cardiomyocyte performance, maturity and senescence. *Biomaterials* **268**,  
854 120554 (2021).
- 855 78. Ashburner, M. *et al.* Gene ontology: tool for the unification of biology. The Gene Ontology  
856 Consortium. *Nat Genet* **25**, 25–29 (2000).
- 857 79. Consortium, G. O. The Gene Ontology resource: enriching a GOld mine. *Nucleic Acids Res* **49**,  
858 D325–D334 (2021).
- 859 80. Mi, H., Muruganujan, A., Ebert, D., Huang, X. & Thomas, P. D. PANTHER version 14: more  
860 genomes, a new PANTHER GO-slim and improvements in enrichment analysis tools. *Nucleic Acids*  
861 *Res* **47**, D419–D426 (2019).
- 862 81. Liebermeister, W. *et al.* Visual account of protein investment in cellular functions. *Proc Natl Acad*  
863 *Sci U S A* **111**, 8488–8493 (2014).
- 864
